# Supplementary material
Source: HighWire-hosted journal article supplement (http://www.jrheum.org/highwire/filestream/32902/field_highwire_adjunct_files/0/170501DataSuppl.pdf)
Supplement: 170501DataSuppl.pdf [file 170501DataSuppl.pdf]

## ONLINE SUPPLEMENTARY DATA

**Supplementary Table 1.** Treatment characteristics for each site and for all patients.

| Treatment intensification at baseline                                       | Site 1<br>(n=22) | Site 2<br>(n=11) | Site 3<br>(n=14) | Site 4<br>(n=4) | Site 5<br>(n=10) | Site 6<br>(n=6) | Total<br>(n=67) |
|-----------------------------------------------------------------------------|------------------|------------------|------------------|-----------------|------------------|-----------------|-----------------|
| Methotrexate initiation, n (%)                                              | 13 (59.1)        | 2 (18.2)         | 5 (35.7)         | 0 (0.0)         | 3 (30.0)         | 0 (0.0)         | 23 (34.3)       |
| Methotrexate dose increased, n (%)                                          | 2 (9.1)          | 0 (0.0)          | 1 (7.1)          | 2 (50.0)        | 0 (0.0)          | 1 (16.7)        | 6 (9.0)         |
| Sulphasalazine and Hydroxychloroquine initiation, n (%)                     | 3 (13.6)         | 0 (0.0)          | 0 (0.0)          | 0 (0.0)         | 0 (0.0)          | 0 (0.0)         | 3 (4.5)         |
| Sulphasalazine initiation, n (%)                                            | 0 (0.0)          | 0 (0.0)          | 0 (0.0)          | 0 (0.0)         | 0 (0.0)          | 1 (16.7)        | 1 (1.5)         |
| Hydroxychloroquine initiation, n (%)                                        | 0 (0.09)         | 0 (0.0)          | 0 (0.0)          | 0 (0.0)         | 0 (0.0)          | 0 (0.0)         | 0 (0.0)         |
| Leflunomide initiation, n (%)                                               | 1 (4.5)          | 1 (9.1)          | 0 (0.0)          | 2 (50.0)        | 0 (0.0)          | 0 (0.0)         | 4 (6.0)         |
| Biological disease-modifying anti-rheumatic drug initiation, n (%)          | 11 (50.0)        | 8 (72.7)         | 8 (57.1)         | 0 (0.0)         | 8 (80.0)         | 4 (66.7)        | 39 (58.2)       |
| Prednisolone, n (%)                                                         | 1 (13.6)         | 3 (27.3)         | 5 (35.7)         | 1 (25.0)        | 0 (0.0)          | 5 (83.3)        | 15 (22.4)       |
| Total intramuscular injection of glucocorticoid, n (%)                      | 4 (18.2)         | 0 (0.0)          | 0 (0.0)          | 0 (0.0)         | 0 (0.0)          | 0 (0.0)         | 4 (6.0)         |
| Total intratenosynovial injection of glucocorticoid, n (%)                  | 7 (31.8)         | 0 (0.0)          | 0 (0.0)          | 0 (0.0)         | 0 (0.0)          | 0 (0.0)         | 7 (10.5)        |
| Total intraarticular injection of glucocorticoid, n (%)                     | 20 (29.9)        | 0 (0.0)          | 0 (0.0)          | 0 (0.0)         | 0 (0.0)          | 1 (16.7)        | 21 (31.3)       |
| <b>Treatment intensification during study</b>                               |                  |                  |                  |                 |                  |                 |                 |
| Addition of sulphasalazine and hydroxychloroquine (n)                       | 1 (4.5)          | 0 (0.0)          | 0 (0.0)          | 0 (0.0)         | 0 (0.0)          | 0 (0.0)         | 1 (1.5)         |
| Addition of leflunomide, n (%)                                              | 0 (0.0)          | 1 (9.1)          | 0 (0.0)          | 0 (0.0)         | 0 (0.0)          | 0 (0.0)         | 1 (1.5)         |
| Addition hydroxychloroquine therapy, n (%)                                  | 0 (0.0)          | 1 (9.1)          | 0 (0.0)          | 1 (25.0)        | 0 (0.0)          | 1 (16.7)        | 3 (4.5)         |
| Addition of biological disease-modifying anti-rheumatic drug therapy, n (%) | 2 (9.1)          | 0 (0.0)          | 0 (0.0)          | 0 (0.0)         | 1 (10.0)         | 1 (16.7)        | 4 (6.0)         |

Data is shown as number (percentage).

**Supplementary Table 2.** Change in grey scale and Doppler tenosynovitis scores, and their standardized response mean, during 6 months follow-up, for each site and for all patients.

| Site - Imaging modality          |                  | Baseline |         | Δ 0-3 month |             | p     | SRM | Δ 3-6 month |          | p     | SRM | Δ 0-6 month |           | p     | SRM |
|----------------------------------|------------------|----------|---------|-------------|-------------|-------|-----|-------------|----------|-------|-----|-------------|-----------|-------|-----|
| Site 1 - Grey scale<br>(n=22)    | Median [25p;75p] | 6        | [2;8]   | -2          | [-5;0]      | <0.01 | 0.9 | -1.0        | [-2;0]   | <0.01 | 0.8 | -4          | [-7;-2]   | <0.01 | 1.1 |
|                                  | Mean ±SD         | 6.3      | ±4.3    | -3.4        | ±3.8        |       |     | -1.4        | ±1.8     |       |     | -4.8        | ±4.3      |       |     |
| Site 1 - Doppler                 | Median [25p;75p] | 6        | [3;9]   | -3.5        | [-9;-2]     | <0.01 | 0.7 | 0           | [-2;0]   | 0.09  | 0.4 | -4          | [-2;-9]   | <0.01 | 0.7 |
|                                  | Mean ±SD         | 6.4      | ±5.2    | -4.8        | ±5.3        |       |     | -1.0        | ±2.4     |       |     | -5.8        | ±5.4      |       |     |
| Site 2 - Grey scale<br>(n=11)    | Median [25p;75p] | 6        | [5;9]   | -1          | [-3;1]      | 0.3   | 0.3 | -3          | [-4;0]   | 0.07  | 0.7 | -4          | [-9;0]    | 0.04  | 0.8 |
|                                  | Mean ±SD         | 6.5      | ±2.9    | -1.0        | ±3.4        |       |     | -2.4        | ±3.3     |       |     | -3.9        | ±4.9      |       |     |
| Site 2 - Doppler                 | Median [25p;75p] | 5        | [2;6]   | -1          | [-5;0]      | 0.12  | 0.6 | 0           | [-2;0]   | 0.36  | 0.3 | -4          | [-5;-1]   | 0.06  | 0.7 |
|                                  | Mean ±SD         | 4.6      | ±2.9    | -2.0        | ±3.4        |       |     | -1.2        | ±3.7     |       |     | -2.8        | ±3.8      |       |     |
| Site 3 - Grey scale<br>(n=14)    | Median [25p;75p] | 3        | [2;4]   | -2          | [-3;0]      | <0.01 | 1.0 | -0.5        | [-1;1]   | 0.69  | 0.0 | -2          | [-2;-3]   | 0.01  | 0.7 |
|                                  | Mean ±SD         | 3.4      | ±2.6    | -2.3        | ±2.4        |       |     | -0.1        | ±2.4     |       |     | -2.2        | ±3.2      |       |     |
| Site 3 - Doppler                 | Median [25p;75p] | 3        | [2;4]   | -2          | [-3;-1]     | <0.01 | 0.9 | 0           | [-1;0]   | 0.74  | 0.0 | -2          | [-4;-1]   | 0.01  | 0.8 |
|                                  | Mean ±SD         | 3.4      | ±2.6    | -2.6        | ±3.0        |       |     | -0.1        | ±2.3     |       |     | -2.6        | ±3.4      |       |     |
| Site 4 - Grey scale<br>(n=4)     | Median [25p;75p] | 3        | [2;3.5] | -1.5        | [-2.5;-0.5] | 0.25  | 1.2 | 0           | [-1.5;3] | 0.75  | 0.2 | -1.5        | [-2.5;1]  | 0.75  | 0.3 |
|                                  | Mean ±SD         | 2.8      | ±1.6    | -1.5        | ±1.3        |       |     | -0.8        | ±3.8     |       |     | -0.8        | ±2.6      |       |     |
| Site 4 - Doppler                 | Median [25p;75p] | 1.5      | [1;2]   | -1          | [-1.5;-0.5] | 0.25  | 1.2 | 0           | [-1;0.5] | 1.0   | 0.2 | -1          | [-1;-1.5] | 0.13  | 2.6 |
|                                  | Mean ±SD         | 1.5      | ±0.6    | -1.0        | ±0.8        |       |     | -0.3        | ±1.3     |       |     | -1.3        | ±0.5      |       |     |
| Site 5 - Grey scale<br>(n=10)    | Median [25p;75p] | 3        | [2;7]   | -2.0        | [-3;-2]     | <0.01 | 2.1 | 0           | [-1;0]   | 0.5   | 0.3 | -2          | [-3;-2]   | <0.01 | 1.3 |
|                                  | Mean ±SD         | 4.5      | ±3.4    | -2.5        | ±1.2        |       |     | -0.5        | ±1.6     |       |     | -3.0        | ±2.3      |       |     |
| Site 5 - Doppler                 | Median [25p;75p] | 3        | [2;4]   | -3          | [-3;-1]     | <0.01 | 1.2 | 0           | [-1;-0]  | <0.01 | 0.7 | -3          | [-3;-1.5] | <0.01 | 1.2 |
|                                  | Mean ±SD         | 4        | ±3.2    | -3.3        | ±2.8        |       |     | -0.6        | ±0.8     |       |     | -3.9        | ±3.2      |       |     |
| Site 6 - Grey scale<br>(n=6)     | Median [25p;75p] | 4.5      | [3;6]   | -1          | [-2;-0]     | 0.13  | 1.1 | -0.5        | [-1;0]   | 0.5   | 0.5 | -1.5        | [-2;-1]   | 0.06  | 2.4 |
|                                  | Mean ±SD         | 4.3      | ±1.6    | -1.0        | ±0.9        |       |     | -0.5        | ±1.0     |       |     | -2.0        | ±0.8      |       |     |
| Site 6 - Doppler                 | Median [25p;75p] | 2.5      | [2;3]   | -1.5        | [-2;-1]     | 0.06  | 1.4 | 0           | [-2;0]   | 0.5   | 0.6 | -2          | [-3;1]    | 0.06  | 1.1 |
|                                  | Mean ±SD         | 2.7      | ±2.0    | -1.5        | ±1.0        |       |     | 0.8         | ±1.3     |       |     | -2.3        | ±2.1      |       |     |
| All sites - Grey scale<br>(n=67) | Median [25p;75p] | 4        | [2;7]   | -2          | [-3;0]      | <0.01 | 0.8 | -1.0        | [-2;0]   | <0.01 | 0.4 | -2          | [-5;-5]   | <0.01 | 0.9 |
|                                  | Mean ±SD         | 5.0      | ±3.4    | -2.4        | ±2.9        |       |     | -0.9        | ±2.4     |       |     | -3.3        | ±3.8      |       |     |
| All sites - Doppler<br>(n=67)    | Median [25p;75p] | 3        | [2;6]   | -2          | [-4;-1]     | <0.01 | 0.8 | 0           | [-2;0]   | <0.01 | 0.3 | -3          | [-5;-2]   | <0.01 | 0.9 |
|                                  | Mean ±SD         | 4.5      | ±3.9    | -3.1        | ±3.9        |       |     | -0.7        | ±2.3     |       |     | -3.8        | ±4.2      |       |     |

*P*, *p*-value for Wilcoxon's test for change of paired data between 2 time points; *N*, number of patients; *SRM*, standardized response mean. Values in brackets are values at 25th and 75th percentiles

**Supplementary Table 3.** Change in DAS-28 and HAQ scores, and their standardized response mean, during 6 months follow-up, for each site and for all patients.

| Site - Imaging modality  |                  | Baseline |              | Δ 0-3 month |                | P     | SRM | Δ 3-6 month |                | P     | SRM | Δ 0-6 month |                | P     | SRM |
|--------------------------|------------------|----------|--------------|-------------|----------------|-------|-----|-------------|----------------|-------|-----|-------------|----------------|-------|-----|
| Site 1 - DAS28<br>(n=22) | Median [25p;75p] | 5.2      | [4.5;6]      | -1.7        | [-2.6;0.6]     | <0.01 | 0.7 | -0.6        | [-0.9;0.1]     | <0.01 | 0.6 | -2.2        | [-3.6;-1]      | <0.01 | 1.2 |
|                          | Mean ±SD         | 4.9      | ±1.4         | -1.5        | ±1.5           |       |     | -0.6        | ±0.9           |       |     | -2.1        | ±1.8           |       |     |
| Site 1 - HAQ             | Median [25p;75p] | 1.25     | [0.875;1.75] | -0.625      | [-1;-0.25]     | <0.01 | 0.1 | 0           | [0;0.25]       | 0.18  | 0.3 | -0.625      | [-1.125;-0.25] | <0.01 | 1.3 |
|                          | Mean ±SD         | 1.2      | ±0.66        | -0.8        | ±0.6           |       |     | 0           | ±0.2           |       |     | -0.7        | ±0.6           |       |     |
| Site 2 - DAS28<br>(n=11) | Median [25p;75p] | 4.7      | [4.3;5.3]    | -2.3        | [-2.8;-0.2]    | 0.01  | 1.0 | -1.2        | [-2.45;-0.2]   | 0.03  | 0.8 | -2.5        | [-3.4;-2]      | <0.01 | 2.3 |
|                          | Mean ±SD         | 5        | ±1.4         | -1.7        | ±1.6           |       |     | -1.2        | ±1.6           |       |     | -2.8        | ±1.2           |       |     |
| Site 2 - HAQ             | Median [25p;75p] | 1        | [0.5;1.375]  | -0.375      | [-0.625;0.125] | 0.03  | 0.7 | -0.225      | [-0.625;0]     | 0.04  | 0.8 | -0.5        | [-0.875;-0.25] | <0.01 | 1.4 |
|                          | Mean ±SD         | 0.9      | ±0.6         | -0.3        | ±0.4           |       |     | -0.3        | ±0.4           |       |     | -0.6        | ±0.4           |       |     |
| Site 3 - DAS28<br>(n=14) | Median [25p;75p] | 4.2      | [3.5;5]      | -1.2        | [-2.4;-0.3]    | 0.01  | 0.8 | -0.4        | [-1.3;1.3]     | 0.75  | 0.1 | -1.5        | [-2.7;-1.1]    | <0.01 | 1   |
|                          | Mean ±SD         | -4       | ±1.2         | -1.5        | ±1.8           |       |     | -0.1        | ±2.1           |       |     | -1.6        | ±1.6           |       |     |
| Site 3 - HAQ             | Median [25p;75p] | 1        | [0.25;1.375] | -0.325      | [-0.75;-0]     | 0.05  | 0.5 | -0.125      | [-0.625;0.125] | 0.26  | 0.4 | -0.575      | [-1.125;0]     | 0.02  | 0.8 |
|                          | Mean ±SD         | 0.8      | ±0.6         | -0.3        | ±0.6           |       |     | -0.2        | ±0.5           |       |     | -0.5        | ±0.6           |       |     |
| Site 4 - DAS28<br>(n=4)  | Median [25p;75p] | 3.8      | [3.6;4.0]    | -1.3        | [-2.9;-0.4]    | 0.13  | 1.0 | 0.8         | [-0.5;2.3]     | 0.63  | 0.6 | -0.9        | [-1.4;0]       | 0.25  | 0.8 |
|                          | Mean ±SD         | 3.8      | ±0.3         | -1.7        | ±1.7           |       |     | 0.9         | ±1.6           |       |     | -0.8        | ±1.0           |       |     |
| Site 4 - HAQ             | Median [25p;75p] | 0.5      | [0.5;0.75]   | -0.25       | [-0.75;0]      | 0.50  | 0.8 | 0           | [0;0.5]        | 1.00  | 0.5 | 0           | [-0.25;0]      | 1     | 0.4 |
|                          | Mean ±SD         | 0.6      | ±0.3         | -0.4        | ±0.5           |       |     | 0.25        | ±0.5           |       |     | -0.1        | ±0.3           |       |     |
| Site 5 - DAS28<br>(n=10) | Median [25p;75p] | 3.8      | [3.2;4.8]    | -1.0        | [-2.2;-0.1]    | 0.02  | 0.9 | -0.3        | [-0.6;0]       | 0.12  | 0.4 | -0.8        | [-3;-0.3]      | <0.01 | 0.9 |
|                          | Mean ±SD         | 3.8      | ±0.3         | -1.1        | ±1.8           |       |     | -0.6        | ±1.5           |       |     | -1.7        | ±1.9           |       |     |
| Site 5 - HAQ             | Median [25p;75p] | *        | *            | *           | *              | *     | *   | *           | *              | *     | *   | *           | *              | *     | *   |
|                          | Mean ±SD         | *        | *            | *           | *              |       |     | *           | *              |       |     | *           | *              |       |     |
| Site 6 - DAS28<br>(n=6)  | Median [25p;75p] | 3.6      | [2.8;4.0]    | 0           | [-0.14;0]      | 0.50  | 0.9 | 0           | [0;0]          | 1.0   | 0.4 | -0.1        | [-0.3;0]       | 0.25  | 0.6 |
|                          | Mean ±SD         | 3.6      | ±0.9         | -0.1        | ±0.1           |       |     | -0.2        | ±0.6           |       |     | -0.3        | ±0.5           |       |     |
| Site 6 - HAQ             | Median [25p;75p] | 1.25     | [0.875;1.5]  | -0.312      | [-0.5;0]       | 0.19  | 0.7 | 0           | [0;0]          | 1.0   | 0.0 | -0.375      | [-0.5;-0.25]   | 0.09  | 1.0 |
|                          | Mean ±SD         | 1.3      | ±0.6         | -0.4        | ±0.5           |       |     | 0           | ±0.2           |       |     | -0.4        | ±0.4           |       |     |

|                            |                  |     |           |       |           |       |     |      |            |       |     |        |             |       |     |
|----------------------------|------------------|-----|-----------|-------|-----------|-------|-----|------|------------|-------|-----|--------|-------------|-------|-----|
| Site all - DAS28<br>(n=67) | Median [25p;75p] | 4.6 | [3.7;5.3] | -1.4  | [-48;-2]  | <0.01 | 0.9 | -0.4 | [-1.3;0.1] | <0.01 | 0.3 | -1.6   | [-3.2;-0.7] | <0.01 | 1.1 |
|                            | Mean ±SD         | 4.4 | ±1.3      | -1.4  | ±1.5      |       |     | -0.5 | ±1.5       |       |     | -1.8   | ±1.7        |       |     |
| Site all - HAQ<br>(n=67)   | Median [25p;75p] | 1.0 | [0.5;1.5] | -0.25 | [-0.75;0] | <0.01 | 0.8 | 0    | [-0.25;0]  | 0.02  | 0.3 | -0.375 | [-0.875;0]  | <0.01 | 0.9 |
|                            | Mean ±SD         | 1.0 | ±0.6      | -0.4  | ±0.4      |       |     | -0.1 | ±0.3       |       |     | -0.5   | ±0.5        |       |     |

P, p-value for Wilcoxon's test for change of paired data between 2 time points; SRM, standardized response mean; N, number of patients; DAS28, Disease Activity Score for 28 joints, using CRP, C-reactive protein; HAQ, health assessment questionnaire; \*, no available HAQ score. Values in brackets are values at 25th and 75th percentiles

**Supplementary Table 4.** Change in CRP, VAS-patient TS and VAS Global scores, and their standardized response mean, during 6 months follow-up, for each site and for all patients.

| Site - Imaging modality |                  | Baseline |         | Δ 0-3 month |           | P     | SRM | Δ 3-6 month |           | P     | SRM | Δ 0-6 month |            | P     | SRM |
|-------------------------|------------------|----------|---------|-------------|-----------|-------|-----|-------------|-----------|-------|-----|-------------|------------|-------|-----|
| Site 1 - CRP<br>(n=22)  | Median [25p;75p] | 14.5     | [8;34]  | -8.5        | [-29;-1]  | <0.01 | 0.7 | -0.5        | [-5;-0]   | 0.08  | 0.4 | -9.5        | [-32;-3]   | <0.01 | 0.7 |
|                         | Mean ±SD         | 31.1     | ±38.4   | -22.6       | ±34       |       |     | 4           | ±11.3     |       |     | -26.6       | ±39.4      |       |     |
| Site 1 - VAS-patient TS | Median [25p;75p] | 61.5     | [46;78] | -44         | [-62;-24] | <0.01 | 1.6 | -3          | [-13;3]   | 0.16  | 0.3 | -43         | [-69;-32]  | <0.01 | 1.8 |
|                         | Mean ±SD         | 62.9     | ±18.5   | -42.8       | ±26.4     |       |     | -5.6        | ±19.7     |       |     | -48.4       | ±27.1      |       |     |
| Site 1 - VAS Global     | Median [25p;75p] | 68       | [56;81] | 32          | [-54;-10] | <0.01 | 1.2 | -0.5        | [-13;8]   | 0.74  | 0.2 | -40         | [-1;0]     | <0.01 | 1.3 |
|                         | Mean ±SD         | 65.0     | ±21.6   | 32          | ±26.4     |       |     | -4.9        | ±24.7     |       |     | -36.9       | ±27.8      |       |     |
| Site 2 - CRP<br>(n=11)  | Median [25p;75p] | 10       | [1;50]  | -9          | [-10;0]   | 0.13  | 0.4 | 0           | [-9;0]    | 0.13  | 0.6 | -9          | [-19;0]    | 0.09  | 0.5 |
|                         | Mean ±SD         | 22.9     | ±32.1   | -13.3       | ±31.7     |       |     | -4.3        | ±6.6      |       |     | -17.5       | ±36.1      |       |     |
| Site 2 - VAS-patient TS | Median [25p;75p] | 56       | [50;80] | -20         | [-40;-2]  | <0.01 | 1.2 | -10         | [-40;0]   | <0.01 | 1.1 | -40         | [-60;-30]  | <0.01 | 2.4 |
|                         | Mean ±SD         | 65.1     | ±17.1   | -24.2       | ±20.7     |       |     | -21.8       | ±20.4     |       |     | -46         | ±19.4      |       |     |
| Site 2 - VAS Global     | Median [25p;75p] | 65       | [50;80] | -20         | [-7;-1]   | <0.01 | 1.5 | -30         | [-3;-3]   | 0.14  | 0.5 | -55         | [-1;0]     | <0.01 | 1.8 |
|                         | Mean ±SD         | 64.7     | ±18.2   | -24.4       | ±16.4     |       |     | -18.1       | ±35.2     |       |     | -42.5       | ±30.2      |       |     |
| Site 3 - CRP<br>(n=14)  | Median [25p;75p] | 10       | [5;20]  | -5.5        | [-18;0]   | 0.06  | 0.5 | -1.5        | [-2;4]    | 0.58  | 0.0 | -4.5        | [-20;-3]   | 0.09  | 0.3 |
|                         | Mean ±SD         | 16.8     | ±16.1   | -9.3        | ±18.7     |       |     | 0.6         | ±21.5     |       |     | -8.6        | ±25.3      |       |     |
| Site 3 - VAS-patient TS | Median [25p;75p] | 31.5     | [10;60] | -23         | [-50;0]   | 0.02  | 0.7 | -2.5        | [-15;20]  | 0.94  | 0.0 | -20         | [-55;0]    | 0.02  | 0.6 |
|                         | Mean ±SD         | 33.8     | ±27.5   | -22.8       | ±31.5     |       |     | -0.3        | ±26.6     |       |     | -23.1       | ±35.7      |       |     |
| Site 3 - VAS Global     | Median [25p;75p] | 50       | [20;60] | -25         | [-50;-10] | <0.01 | 0.9 | -2.5        | [-10; 25] | 0.85  | 0.1 | -20         | [-41;-10]  | 0.01  | 0.8 |
|                         | Mean ±SD         | 42.7     | ±22.2   | -24.7       | ±26.4     |       |     | 1.9         | ±31.6     |       |     | -22.8       | ±28.5      |       |     |
| Site 4 - CRP<br>(n=4)   | Median [25p;75p] | 22.5     | [15;46] | -18         | [-39;-10] | 0.13  | 1.1 | 3           | [-3.5;8]  | 0.63  | 0.3 | -19.5       | [-42.5;-2] | 0.25  | 0.8 |
|                         | Mean ±SD         | 30.5     | ±22.2   | -24.5       | ±22.6     |       |     | 2.3         | ±8.0      |       |     | -22.3       | ±26.7      |       |     |
| Site 4 - VAS-patient TS | Median [25p;75p] | 40       | [35;45] | -25         | [-40;-5]  | 0.25  | 1.1 | -5          | [-15;30]  | 1.00  | 0.2 | -40         | [-30;0]    | 0.50  | 0.6 |
|                         | Mean ±SD         | 40.0     | ±8.2    | -22.5       | ±20.6     |       |     | -7.5        | ±35.9     |       |     | -15         | ±25.2      |       |     |

|                                  |                  |      |            |       |            |       |     |      |          |       |     |       |           |       |     |
|----------------------------------|------------------|------|------------|-------|------------|-------|-----|------|----------|-------|-----|-------|-----------|-------|-----|
| Site 4 - VAS Global              | Median [25p;75p] | 45   | [36; 50]   | -21   | [-36;-15]  | 0.13  | 1.5 | 10   | [0;20]   | 0.50  | 0.9 | -16   | [-26;-5]  | 0.25  | 1.2 |
|                                  | Mean ±SD         | 43.0 | ±8.7       | -25.5 | ±17.1      |       |     | 10   | ±11.5    |       |     | -15.5 | ±13.2     |       |     |
| Site 5 - CRP (n=10)              | Median [25p;75p] | 10.0 | [8.0;15.0] | -5.5  | [-11;-2.0] | <0.01 | 1.1 | -1.5 | [-4;0]   | 0.17  | 0.5 | -6    | [-11;-3]  | <0.01 | 1.0 |
|                                  | Mean ±SD         | 13.1 | ±7.0       | -7.0  | ±6.6       |       |     | -1.5 | ±3.0     |       |     | -8.1  | ±8.3      |       |     |
| Site 5 - VAS-patient TS          | Median [25p;75p] | 45   | [50;70]    | -32   | [-37;-10]  | <0.01 | 1.4 | 0    | [13;0]   | 0.31  | 0.4 | -45   | [-65;-10] | <0.01 | 1.4 |
|                                  | Mean ±SD         | 43.0 | ±8.7       | -32.4 | ±23.7      |       |     | -8.4 | ±18.9    |       |     | -40.8 | ±28.8     |       |     |
| Site 5 - VAS Global              | Median [25p;75p] | 68   | [50;70]    | -52.5 | [-75;-40]  | <0.01 | 2.1 | 0    | [-10;10] | 0.72  | 0.1 | -52.5 | [-70;-48] | <0.01 | 2.1 |
|                                  | Mean ±SD         | 65.3 | ±13.0      | -52.5 | ±25.1      |       |     | 1.2  | ±10.9    |       |     | -51.3 | ±24.0     |       |     |
| Site6 - CRP (n=6)                | Median [25p;75p] | 4    | [3;5]      | -1    | [-1;0]     | 0.31  | 0.7 | -1   | [-1;0]   | 0.13  | 1.4 | -4.5  | [-2;-1]   | <0.01 | 1.6 |
|                                  | Mean ±SD         | 4.2  | ±1.2       | -0.7  | ±1.0       |       |     | -0.7 | ±0.5     |       |     | -1.3  | ±29.9     |       |     |
| Site 6 - VAS-patient TS          | Median [25p;75p] | 30   | [20;35]    | -7.5  | [-10;0]    | 0.56  | 0.1 | -10  | [-10;0]  | 0.31  | 0.6 | 10    | [-15;-5]  | 0.06  | 1.4 |
|                                  | Mean ±SD         | 29.2 | ±13.6      | -1.7  | ±13.7      |       |     | -8.3 | ±13.3    |       |     | 10    | ±7.1      |       |     |
| Site 6 - VAS Global              | Median [25p;75p] | 37.5 | [30;40]    | -10   | [-10;-5]   | 0.06  | 1.8 | -10  | [-10;10] | 1.0   | 0.1 | -12.5 | [-20;0]   | 0.19  | 0.8 |
|                                  | Mean ±SD         | 37.5 | ±7.6       | -7.5  | ±4.2       |       |     | -1.7 | ±13.3    |       |     | -9.2  | ±12       |       |     |
| Site all - CRP (n=67)            | Median [25p;75p] | 13   | [6;26]     | -6    | [-19;0]    | <0.01 | 0.5 | 0    | [-4;0]   | <0.01 | 0.2 | -7    | [-23;-2]  | <0.01 | 0.5 |
|                                  | Mean ±SD         | 22.5 | ±28.3      | -14.1 | ±25.2      |       |     | -2.0 | ±12.1    |       |     | -16.1 | ±30.7     |       |     |
| Site all - VAS-patient TS (n=67) | Median [25p;75p] | 50   | [40;70]    | -31   | [-48;-10]  | <0.01 | 1.1 | -5   | [-15;0]  | <0.01 | 0.3 | -40   | [-60;-17] | <0.01 | 1.2 |
|                                  | Mean ±SD         | 52.4 | ±23.7      | -29.1 | ±27.2      |       |     | -7.0 | ±22.5    |       |     | -36.1 | ±29.7     |       |     |
| Site all - VAS Global (n=67)     | Median [25p;75p] | 58.5 | [40;74]    | -29   | [-50;-10]  | <0.01 | 1.2 | 0    | [-13;15] | 0.44  | 0.1 | -36   | [-55;-10] | <0.01 | 1.2 |
|                                  | Mean ±SD         | 56.4 | ±21.5      | -29.7 | ±25.2      |       |     | -3.6 | ±25.9    |       |     | -33.3 | ±28.4     |       |     |

*P*, *p*-value for Wilcoxon's test for changes of paired data between 2 time points; *N*, number of patients; *SRM*, standardized response mean; *CRP*, C-reactive protein; *VAS-patient TS*, patient-reported visual analog scale (VAS) tenosynovitis pain score; *VAS Global*, patient global visual analogue scale. Values in brackets are values at 25th and 75th percentiles
